# Supplementary material for: Complexation of Oligo- and Polynucleotides with Methoxyphenyl-Functionalized Imidazolium Surfactants
Source: MDPI journal article supplement (doi:10.3390/pharmaceutics14122685), 2022-12-01
Supplement: s1 [file s1]

Supplementary Materials

# Complexation of Oligo- and Polynucleotides with Methoxyphenyl-Functionalized Imidazolium Surfactants

Darya A. Kuznetsova <sup>1,\*</sup>, Denis M. Kuznetsov <sup>1</sup>, Leysan A. Vasileva <sup>1</sup>, Syumbelya K. Amerhanova <sup>1</sup>, Dilyara N. Valeeva <sup>2</sup>, Diana V. Salakhieva <sup>3</sup>, Viktoriia A. Nikolaeva <sup>3</sup>, Irek R. Nizameev <sup>1</sup>, Daut R. Islamov <sup>4</sup>, Konstantin S. Usachev <sup>4</sup>, Alexandra D. Voloshina <sup>1</sup> and Lucia Ya. Zakharova <sup>1</sup>

<sup>1</sup> Arbuzov Institute of Organic and Physical Chemistry, FRC Kazan Scientific Center, Russian Academy of Sciences, Arbuzov Str. 8, 420088 Kazan, Russia

<sup>2</sup> Institute of Innovation Management, Kazan National Research Technological University, Karl Marx Str. 68, 420015 Kazan, Russia

<sup>3</sup> Institute of Fundamental Medicine and Biology, Kazan (Volga Region) Federal University, Kremlyovskaya Str. 18, 420008 Kazan, Russia

<sup>4</sup> FRC Kazan Scientific Center of RAS, Russian Academy of Sciences, Lobachevsky Street 2/31, 420111 Kazan, Russia

\* Correspondence: dashyna111@mail.ru

**Table S1.** The hydrodynamic diameter ( $D_H$ , nm) of MPI-n/ONu complexes depending on the molar ratio of components (r)

| Compounds  | Surfactant/ONu molar ratio (r) | $D_H$ , nm |
|------------|--------------------------------|------------|
| ONu        | -                              | 3.122±0.5  |
| MPI-10/ONu | 0.06                           | 58.77±3    |
| MPI-10/ONu | 0.4                            | 91.28±2    |
| MPI-10/ONu | 0.86                           | 105.7±3    |
| MPI-10/ONu | 1.77                           | 105.7±4    |
| MPI-10/ONu | 3.6                            | 531.2±9    |
| MPI-10/ONu | 5.5                            | 255±5      |
| MPI-10/ONu | 10                             | 122.4±4    |
| MPI-12/ONu | 0.06                           | 105.7±9    |
| MPI-12/ONu | 0.14                           | 78.82±8    |
| MPI-12/ONu | 0.55                           | 122.4±6    |
| MPI-12/ONu | 1.1                            | 122.4±7    |
| MPI-12/ONu | 1.5                            | 531.2±5    |
| MPI-12/ONu | 3.3                            | 164.2±5    |
| MPI-12/ONu | 4.5                            | 164.2±4    |
| MPI-14/ONu | 0.06                           | 37.84±5    |
| MPI-14/ONu | 0.18                           | 50.75±6    |
| MPI-14/ONu | 0.31                           | 91.28±8    |
| MPI-14/ONu | 0.58                           | 78.82±5    |
| MPI-14/ONu | 1.15                           | 122.4±9    |
| MPI-14/ONu | 1.7                            | 122.4±9    |
| MPI-14/ONu | 2.8                            | 122.4±9    |

|            |      |         |
|------------|------|---------|
| MPI-16/ONu | 0.02 | 8.721±2 |
| MPI-16/ONu | 0.08 | 78.82±3 |
| MPI-16/ONu | 0.12 | 105.7±5 |
| MPI-16/ONu | 0.53 | 91.28±4 |
| MPI-16/ONu | 1.1  | 141.8±8 |
| MPI-16/ONu | 1.7  | 164.2±9 |
| MPI-16/ONu | 2.8  | 141.8±9 |

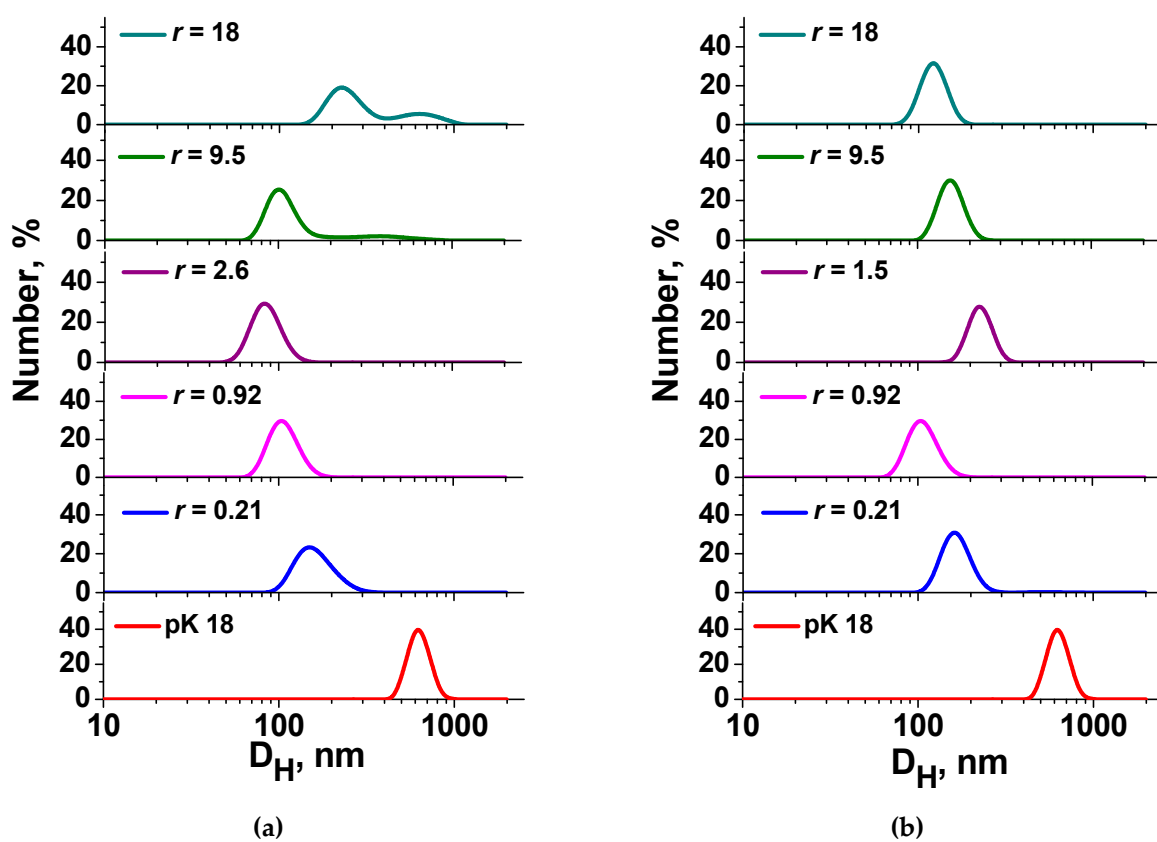

**Figure S1.** Number-averaged size distribution of the MPI-14/pK18 (a) and MPI-16/pK18 (b) complexes at different molar ratios; 25 °C

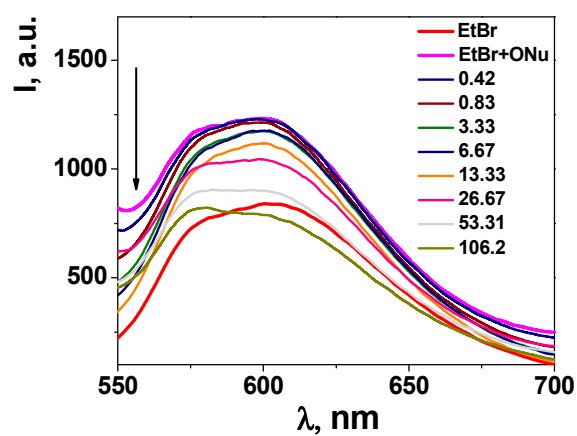

(a)

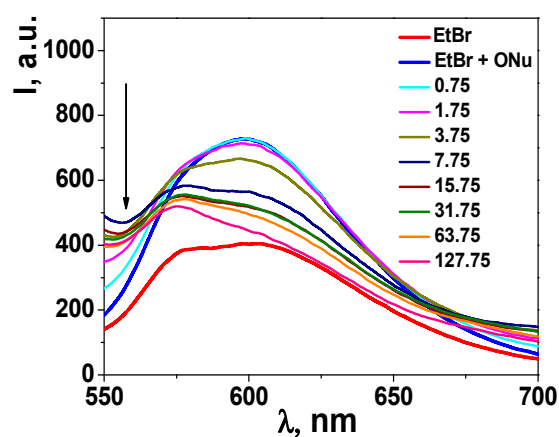

(b)

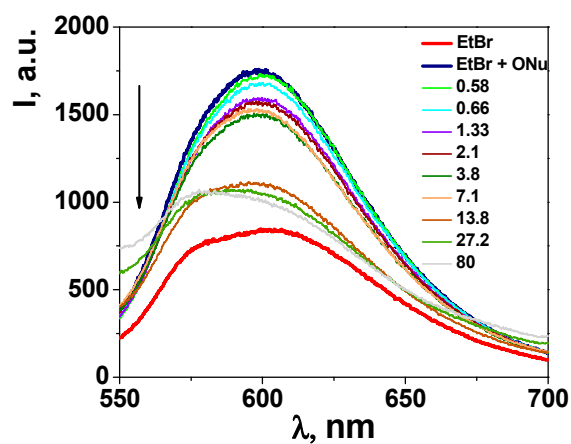

(c)

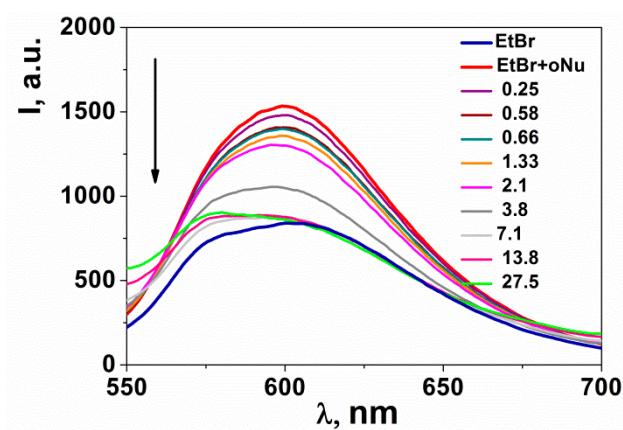

(d)

**Figure S2.** Fluorescence emission spectra of EB/ONu complexes in the presence of various amounts of MPI-n: (a) MPI-10/ONu, (b) MPI-12/ONu, (c) MPI-14/ONu, (d) MPI-16/ONu; 25 °C.

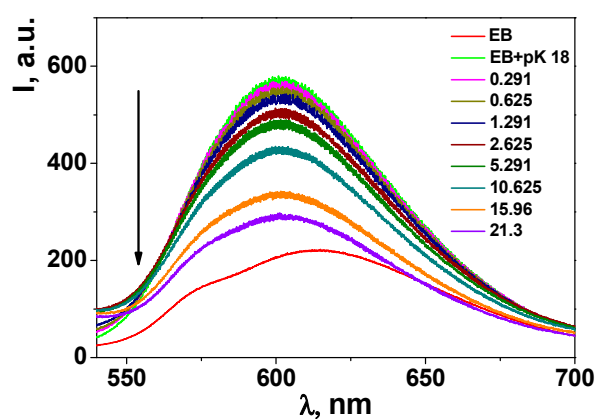

(a)

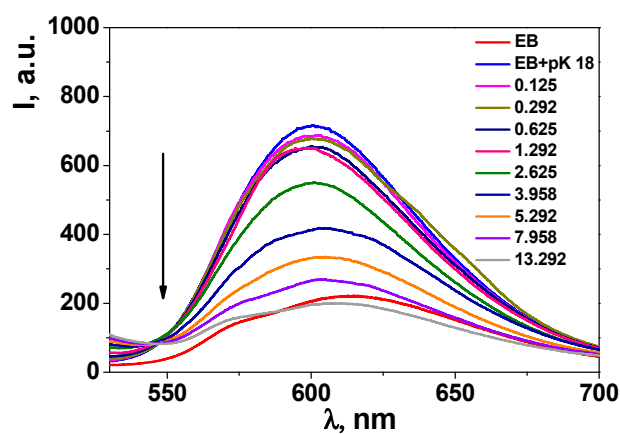

(b)

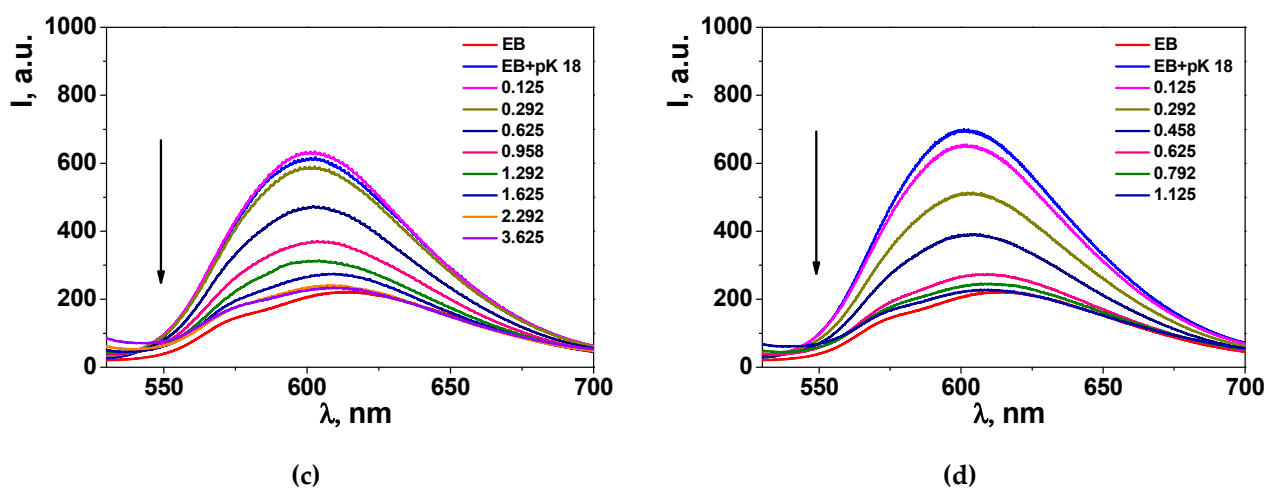

**Figure S3.** Fluorescence emission spectra of EB/pK18 complexes in the presence of various amounts of MPI-n: (a) MPI-10/pK18, (b) MPI-12/pK18, (c) MPI-14/pK18, (d) MPI-16/pK18; 25 °C.

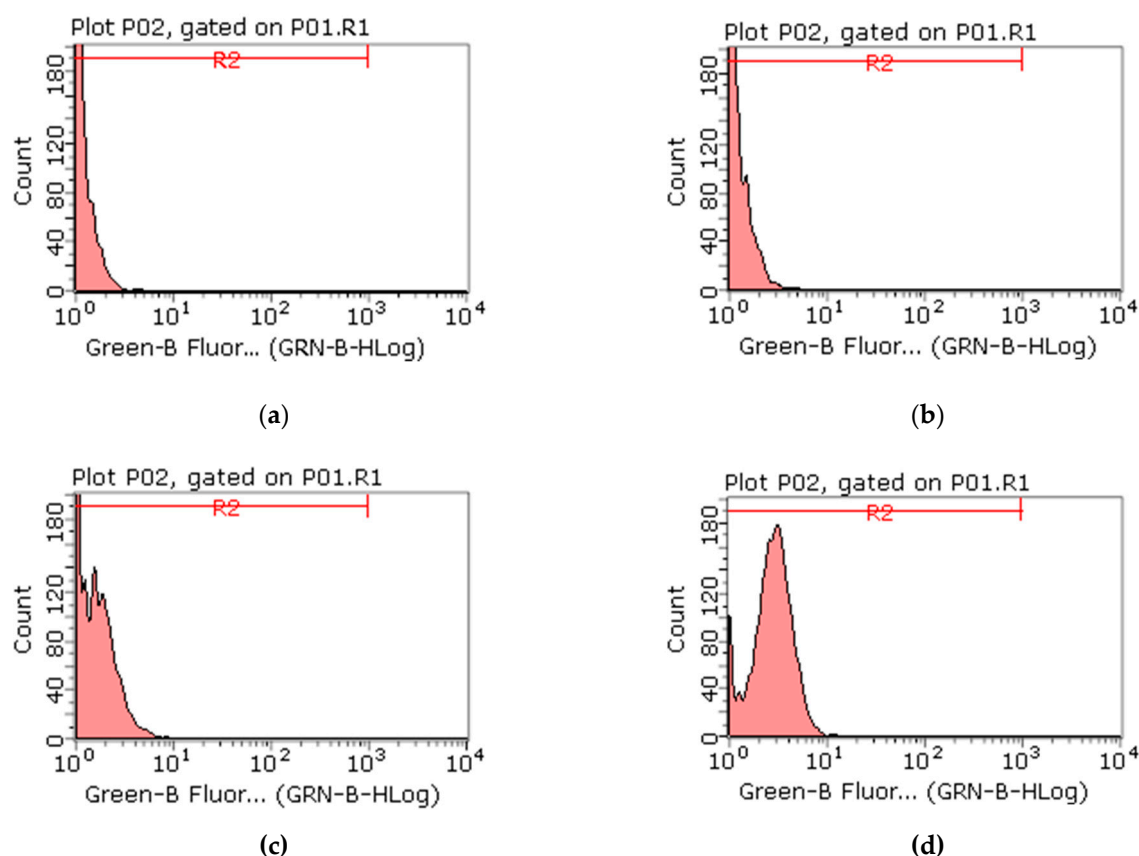

**Figure S4.** Distribution of green fluorescence in A549 cells cultured in the presence of MPI-n/pEGFP-N2 complexes for 24 h: (a) – Control (untreated cells), (b) – Lipofectamine 3000/pEGFP-N2, (c) – MPI-12(650  $\mu$ g/ml)/pEGFP-N2, (d) – MPI-16(325  $\mu$ g/ml)/pEGFP-N2. Red bar confines transfected cells region; percentage value indicates transfection efficacy relative to total cell number. Cells were treated with 4-times diluted complexes and cultured in  $\alpha$ -MEM 0% FBS for 4 h. Lipofectamine 3000 was applied according to the manufacturer's protocol.

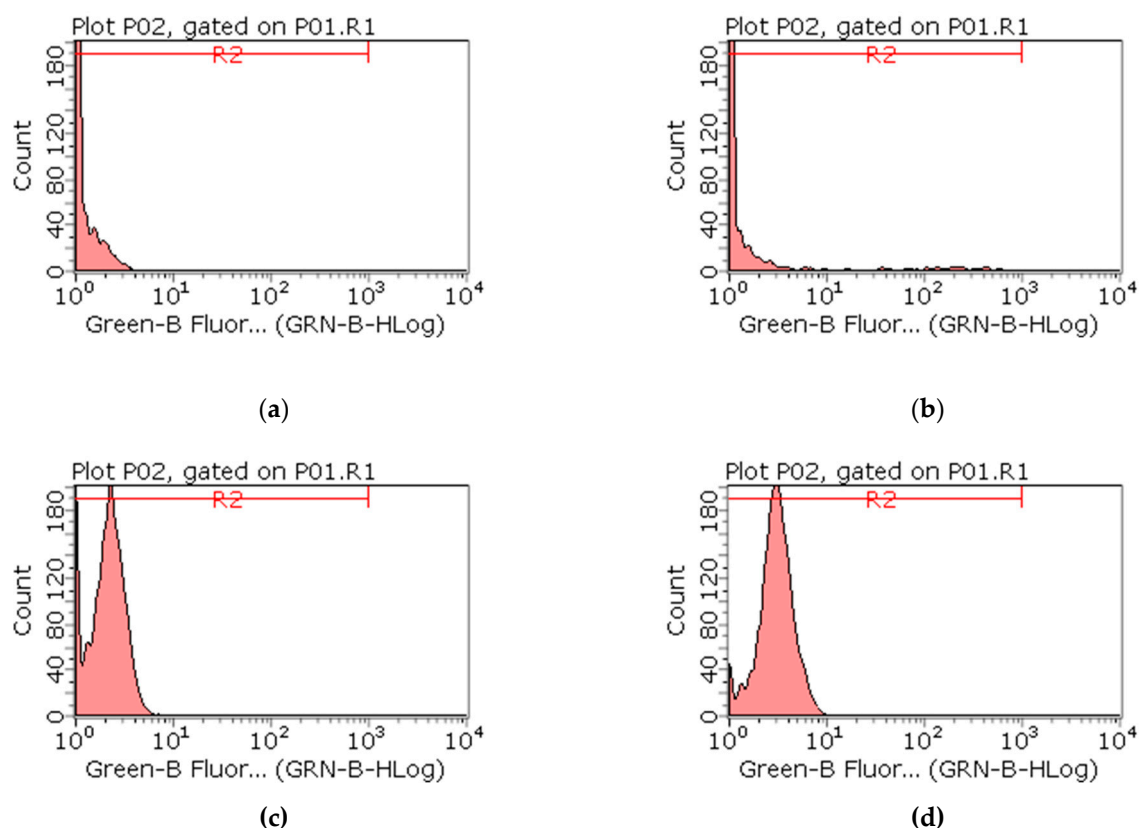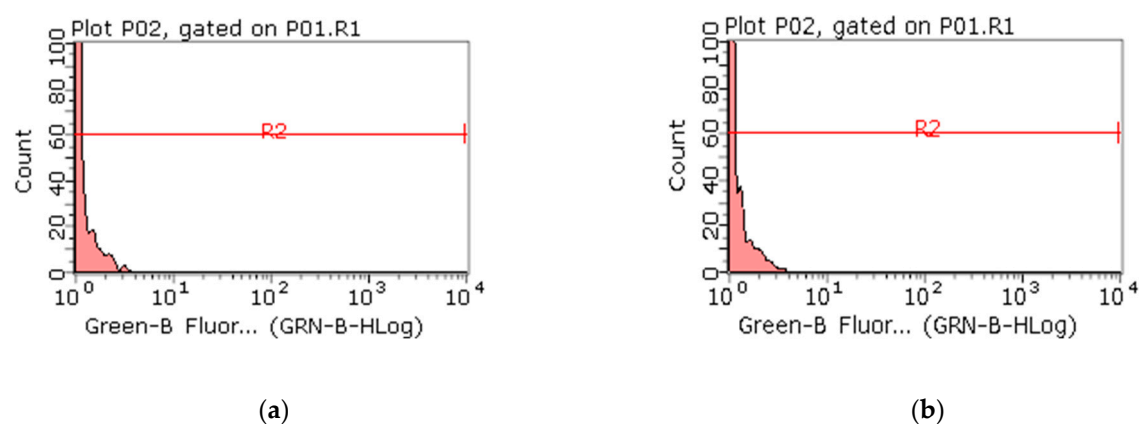

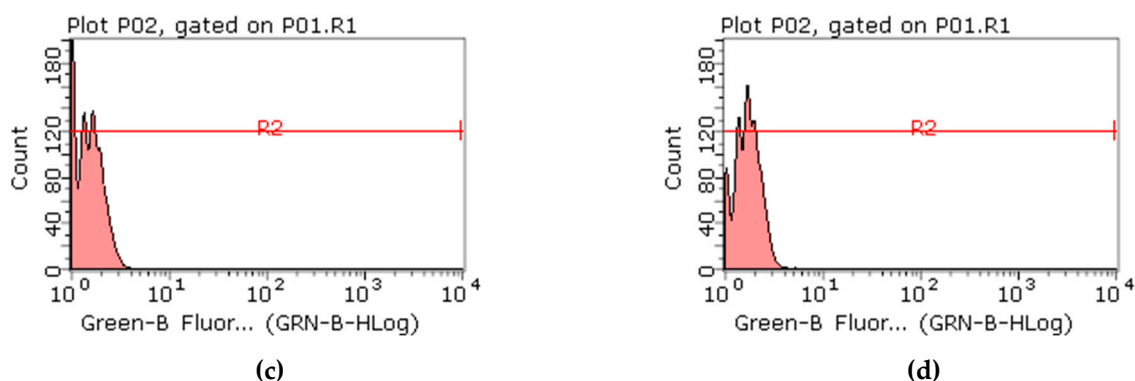

**Figure S6.** Figure. Distribution of green fluorescence in **A549** cells cultured in the presence of MPI-n/pEGFP-N2 complexes for 24 h: (a) – Control (untreated cells), (b) – Lipofectamine 3000/pEGFP-N2, (c) – MPI-12(650  $\mu\text{g/ml}$ )/pEGFP-N2, (d) – MPI-16(325  $\mu\text{g/ml}$ )/pEGFP-N2. Red bar confines transfected cells region; percentage value indicates transfection efficacy relative to total cell number. Cells were treated with 4-times diluted complexes and cultured in  $\alpha$ -MEM/10% FBS for 4 h. Lipofectamine 3000 was applied according to the manufacturer's protocol.

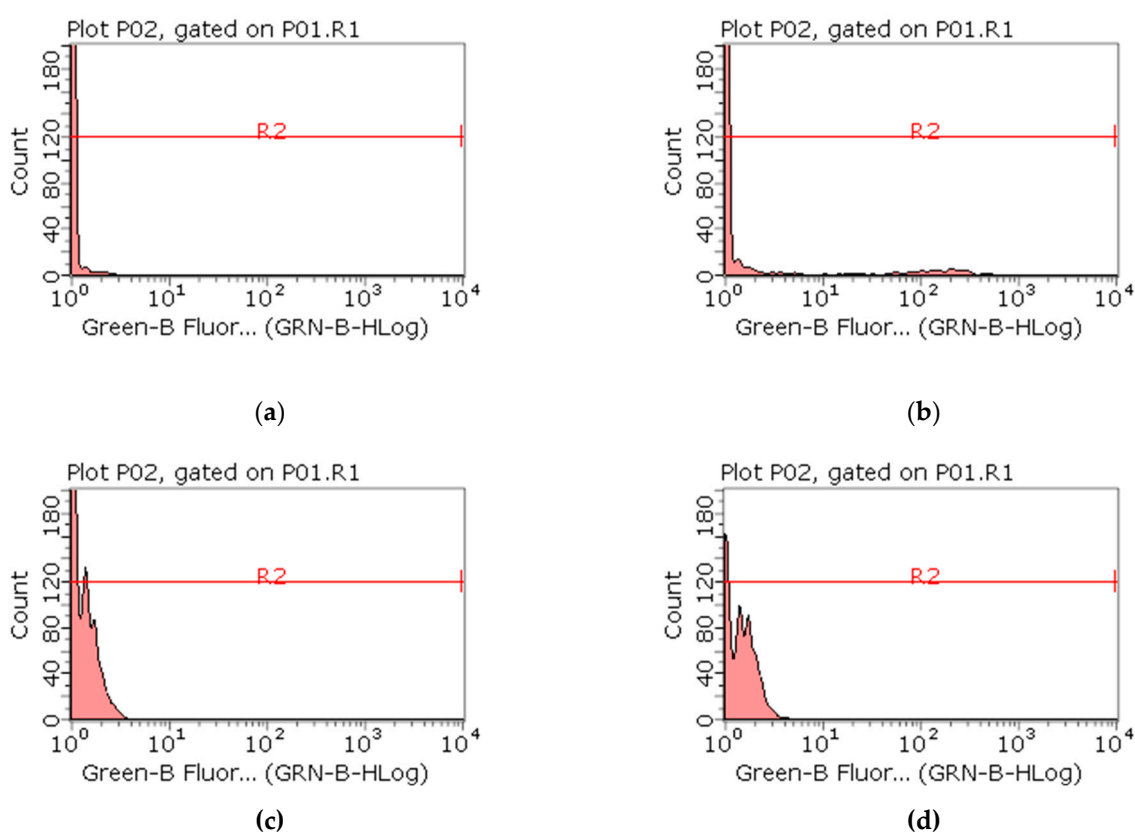

**Figure S7.** Distribution of green fluorescence in **M-HeLa** cells cultured in the presence of MPI-n/pEGFP-N2 complexes for 24 h: (a) – Control (untreated cells), (b) – Lipofectamine 3000/pEGFP-N2, (c) – MPI-12(650  $\mu\text{g/ml}$ )/pEGFP-N2, (d) – MPI-16(325  $\mu\text{g/ml}$ )/pEGFP-N2. Red bar confines transfected cells region; percentage value indicates transfection efficacy relative to total cell number. Cells were treated with 4-times diluted complexes and cultured in  $\alpha$ -MEM/10% FBS for 4 h. Lipofectamine 3000 was applied according to the manufacturer's protocol.



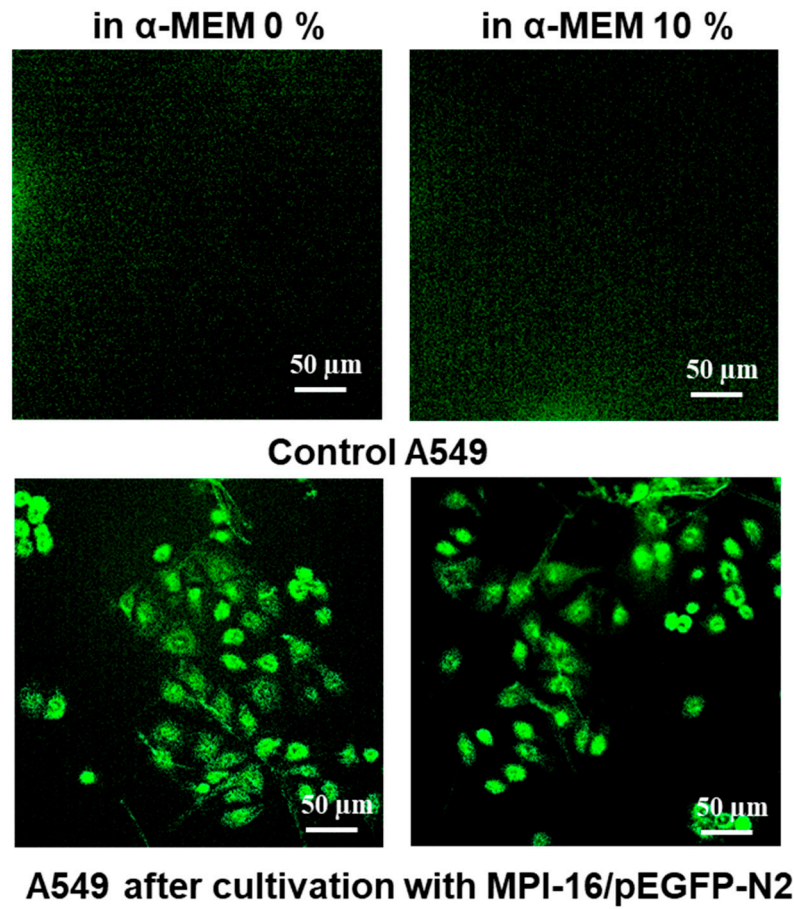

**Figure S8.** Representative fluorescent microphotographs of A549 cells transfected with MPI-16/pEGFP-N2 complexes under different conditions: 0%  $\alpha$ -MEM and 10%  $\alpha$ -MEM; cultivation 24 hours.

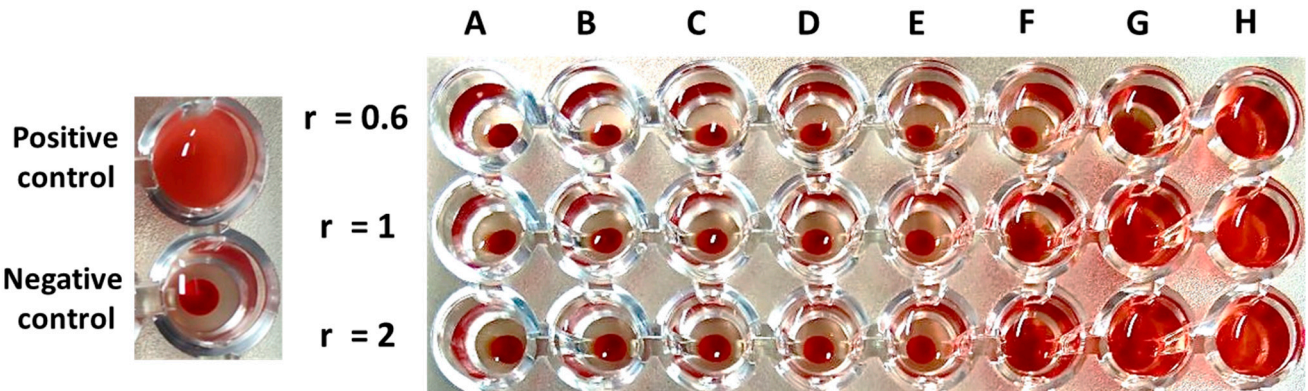

**Figure S9.** Photograph of microplate wells containing blood samples supplemented with MPI-12/ONu complexes at various  $r$ .
